# Full title: Virtual and remote opioid poisoning education and naloxone distribution programs: a scoping review

## Short title: Scoping review on virtual opioid poisoning education

### Authors

[Bruna dos Santos](#)<sup>1¶</sup>, [Rifat Farzan Nipun](#)<sup>1¶</sup>, [Anna Maria Subic](#)<sup>1</sup>, [Alexandra Kubica](#)<sup>1</sup>, Nick Rondinelli<sup>1,2</sup>, [Don Marentette](#)<sup>5</sup>, Joanna Muise<sup>5</sup>, Kevin Paes<sup>5</sup>, [Meghan Riley](#)<sup>5</sup>, Samiya Bhuiya<sup>5</sup>, Jeannene Crosby<sup>5</sup>, Keely McBride<sup>5,6</sup>, [Joe Salter](#)<sup>5,6</sup>, [Aaron M. Orkin](#)<sup>1,3,4\*</sup>

<sup>1</sup> Dalla Lana School of Public Health, University of Toronto, Toronto, Canada

<sup>2</sup> Heart to Heart First Aid CPR Services Inc., Toronto, Canada

<sup>3</sup> Department of Family and Community Medicine, University of Toronto, Toronto, Canada

<sup>4</sup> Li Ka Shing Knowledge Institute of Unity Health Toronto, Toronto, Canada

<sup>5</sup> The Canadian Red Cross Society, Canada

<sup>6</sup> Canadian Red Cross Opioid Harm Reduction Advisory Council, Canada

¶ These authors contributed equally to this work

\* Corresponding author: [aaron.orkin@utoronto.ca](mailto:aaron.orkin@utoronto.ca)

# Abstract

The opioid poisoning crisis is a complex and multi-faceted global epidemic with far-reaching public health effects. Opioid Poisoning Education and Naloxone Distribution (OPEND) programs destigmatize and legitimize harm reduction measures while increasing participants' ability to administer naloxone and other life-saving interventions in opioid poisoning emergencies. While virtual OPEND programs existed prior to the COVID-19 pandemic and were shown to be effective in improving knowledge of opioid poisoning response, they were not widely implemented and evaluated. The COVID-19 pandemic brought both urgent and sustained interest in virtual health services, including harm reduction interventions and OPEND programs.

We aimed to assess the scope of literature related to fully virtual OPEND programming, with or without naloxone distribution, worldwide. A search of the literature was conducted and yielded 7,722 articles, of which 31 studies fit the inclusion criteria. Type and content of the educational component, duration of training, scales used, and key findings were extracted and synthesized. Our search shows that virtual and remote OPEND programs appear effective in increasing knowledge, confidence, and preparedness to respond to opioid poisoning events while improving stigma regarding people who use substances. This effect is shown to be true in a wide variety of populations but is significantly relevant when focused on laypersons. Interventions ranged from the use of videos, websites, telephone calls, and virtual reality simulations. A lack of consensus was found regarding the duration of the activity and the scales used to measure its effectiveness. Despite increasing efforts, access remains an issue, with most interventions addressing White people in urban areas. These findings provide insights for planning, implementation, and evaluation of future virtual and remote OPEND programs.

## Author Summary

Facing a global health challenge, the opioid poisoning crisis affects individuals across all communities, ages, and socioeconomic groups, leading to high fatality rates. Educational programs addressing opioid poisoning have emerged as life-saving and cost-effective interventions. This review focuses on these programs conducted in a virtual setting, eliminating the need for in-person contact between staff and participants. We have identified and summarized evidence about the outcomes of these programs, which may include naloxone distribution. Our findings offer valuable insights for planning, implementing, and evaluating such programs. Furthermore, we highlight gaps in current knowledge, paving the way for future research.

## Introduction

The opioid poisoning crisis is a global health challenge with high fatality rates. The highest rates of opioid poisoning fatality are seen in the United States, followed by Estonia, Canada, and Lithuania(1–3). Opioid-related fatalities have been exacerbated by the increasingly toxic and unregulated drug supply market, contaminated by fentanyl and other substances such as benzodiazepines(2,4). Non-fatal opioid poisonings occur at an even higher rate than fatal opioid poisonings, adding to the social, health, and economic costs of the global opioid poisoning epidemic(5). Opioid-related harms can affect people in all communities, ages, and socioeconomic groups, including family members, friends, healthcare professionals and community members of people with lived or living experience (PWLLE) of opioid use(6,7). Opioid Poisoning Education and Naloxone Distribution (OPEND) programs train and equip people to provide life-saving interventions, including naloxone administration(8–11). OPEND has been shown to save lives, improve knowledge and attitudes, and reduce stigma(8–13). However, rigorously evaluated OPEND programs have generally been limited to interventions involving in-person training and distribution, which can limit access to rural and remote populations and others who are unable or unwilling to access in-person

services(14,15). As numerous programs pivoted away from in-person OPEND offerings during the COVID-19 pandemic, it brought a strong and sustained interest in the effectiveness and implementation of virtual OPEND programming(16).

This scoping review aims to assess the range of literature concerning opioid poisoning education programming conducted entirely without in-person interaction. In compiling a cohesive overview of existing virtual OPEND programs reported in the literature, we aim to support the development and evaluation of future programs.

## Methods

### Objective and Review Question

We synthesized the literature concerning virtual OPEND programming for people who may witness an opioid poisoning. We structured our scoping review question based on the Participants, Concept, Context framework for scoping reviews(17).

- Participants: People at risk of opioid poisoning or likely to witness opioid poisoning or otherwise interested in OPEND program participation.
- Concept: Any opioid poisoning education programming with or without naloxone distribution that is conducted entirely at a distance, without in-person interaction between participants and program personnel.
- Context: Worldwide.

### Language and Terminology

Although ‘overdose’ is a common term, we use ‘opioid poisoning’ throughout this paper. ‘Overdose’ suggests that the primary cause for the health emergency is a matter of incorrect dose, which can place stigmatizing blame on people who experience opioid poisoning. ‘Poisoning’ draws attention to the broader social context leading to these emergencies and the epidemic of toxic drug harms. We also prefer the term ‘opioid poisoning education and

naloxone distribution' over 'take-home naloxone' because the latter does not fully acknowledge the circumstances of the many people who experience opioid poisoning and homelessness and does not sufficiently acknowledge the educational and non-pharmacological elements of these programs.

## Approach and Protocol

The design and methods for this review are reported in accordance with the Preferred Reporting Items for Systematic Reviews and Meta-Analyses Extension for Scoping Reviews (PRISMA-ScR)(18). Further guidance was gained from an adapted version of Arksey and O'Malley's methodological framework on scoping reviews(19) and the Joanna Briggs Institute methodological guidance for conducting systematic scoping reviews(20). A search of MEDLINE and the Cochrane Database of Systematic Reviews was conducted and no current or underway literature reviews on the topic were identified. We developed a review protocol and registered it on Open Science Framework ([osf.io/ew9rq](https://osf.io/ew9rq))(21).

## Search Strategy

An initial limited search on MEDLINE was undertaken to identify papers on the topic using terms according to the Participants, Concept, Context framework(17), including the terms 'virtual', 'education', 'opioids', and related terminology. A University of Toronto health science librarian provided expertise in optimizing the search strategy according to project objectives. The text words contained in the titles and abstracts of relevant papers and index terms were used to develop a full search strategy for OVID MEDLINE, OVID Embase, EBSCO CINAHL, OVID PsycINFO, The Cochrane Library, SCOPUS, and ERIC (S1 Table). The search strategy, including all identified keywords and index terms, was adapted for each included database. Scholarly database searches were conducted on June 1, 2023. The grey literature search was conducted on July 27, 2023, including the Canadian Agency for Drugs and Technologies in Health's (CADTH) Grey Matters website, the System for Information on Grey Literature in Europe (OpenGrey), and TRIP Pro. We screened the references of

included papers to identify additional papers. All supplementary searches are documented in S1 Table.

## Source of Evidence Selection

Following deduplication, titles and abstracts were screened independently by four reviewers (BDS, RFN, AK, and AMS) based on the inclusion criteria. The full-text review of the selected citations was undertaken by BDS and RFN. Reasons for exclusion during full text review were recorded in a PRISMA flow diagram ([Fig 1](#))(18). Any disagreements between the reviewers at any stage of the selection process were resolved through discussion and consensus.

## Data Extraction

Data were extracted in Covidence from included sources by two independent reviewers (BDS and RFN) using a data extraction tool developed by the reviewers and modified from the JBI Manual for Evidence Synthesis(22). The data extracted included publication details (year of publication, country, and type of paper), information about the target population (demographics such as age, gender, and race/ethnicity), intervention components (e.g., internet-based, telephone-based), educational components (topics addressed by the educational portion), key findings, and other details relevant to the review question. All variables extracted are provided (S2 Table). The data extraction tool was first piloted and modified as necessary with ten papers divided between the two reviewers. Any disagreements between the reviewers were resolved through discussion and consensus.

## Data Synthesis

The extracted data are synthesized and summarized in narrative and tabular format. When appropriate, findings were grouped based on themes.

## Results

After deduplication, 7,722 out of the initial 10,003 papers were identified for further review.

After title and abstract screening, 7,631 papers were excluded, and 91 were reviewed in full text ([Fig 1](#)). Full text review elicited 32 papers for inclusion within this scoping review. Sisson et al., 2023 conducted a single study that was reported in two papers and were, therefore, treated and reported here as a single study(23,24).

### Figure 1. PRISMA flowchart.

This figure depicts studies that were included in the scoping review at each stage of the review process.

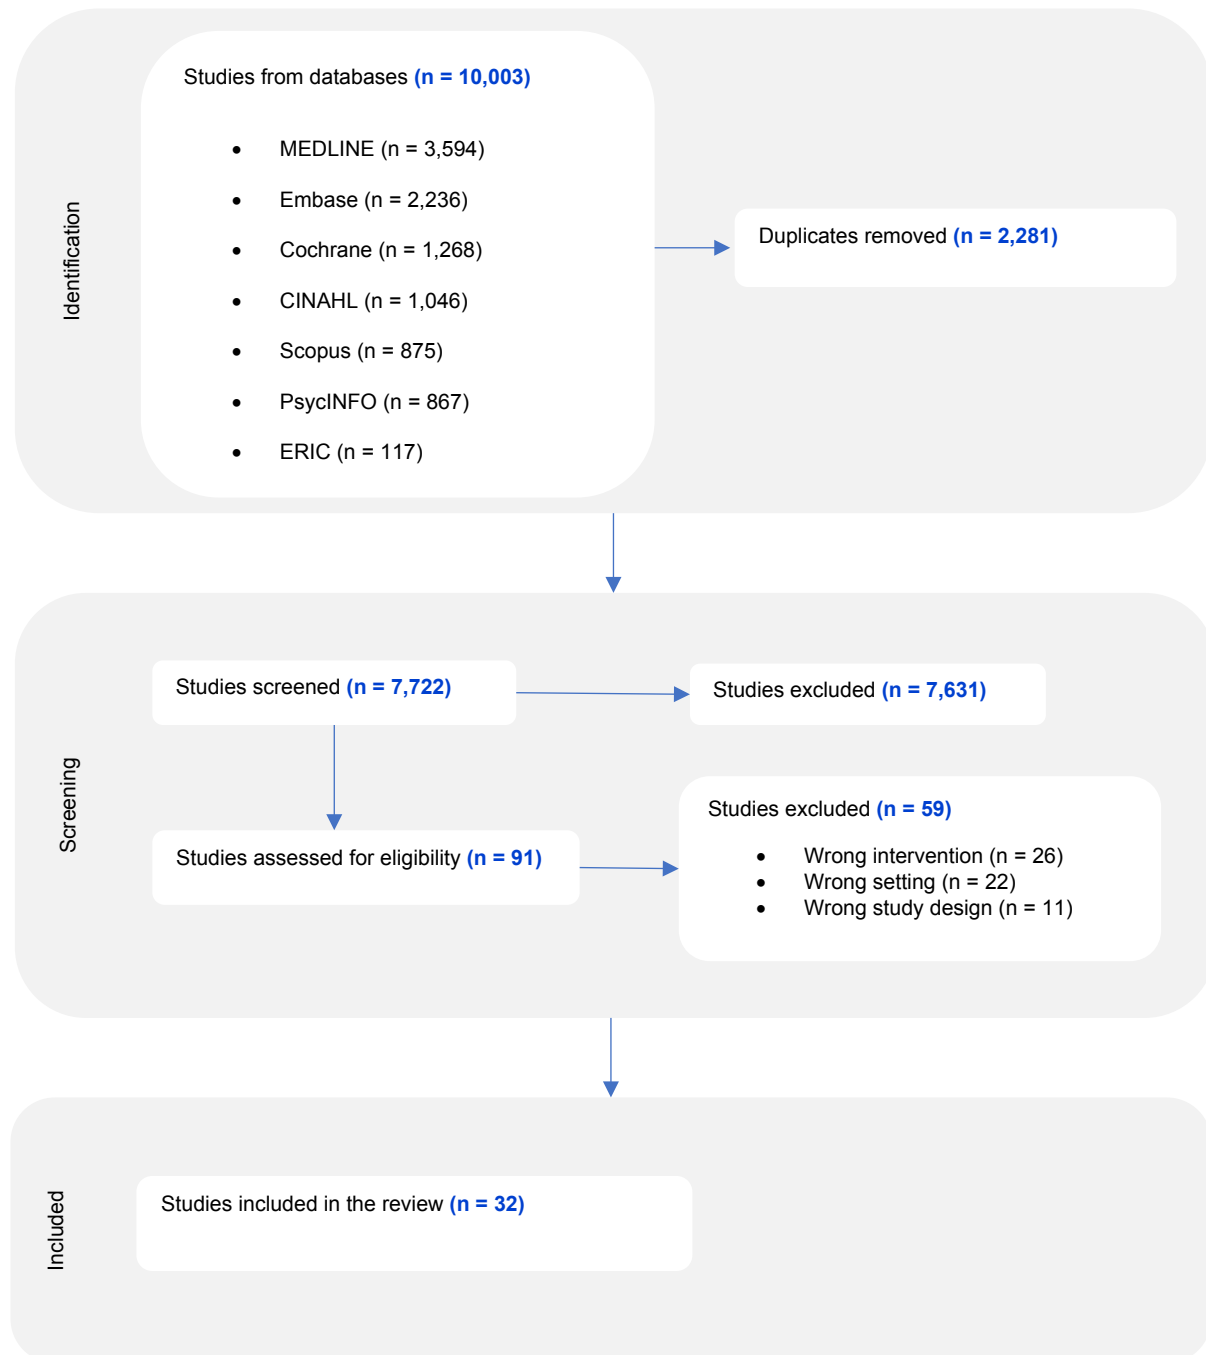



134 Characteristics of included papers are specified in [Table 1](#). Seventeen studies have a quasi-  
135 experimental pre-post design, eleven are descriptive, two are randomized controlled trials,  
136 and one is a non-randomized controlled trial. The publication period extended from 2016 to  
137 2023, peaking notably in 2022 (25%, n=8). Of the studies included in our analysis, 30 (97%)  
138 were based in the United States of America; one was conducted in Australia.

139 **Table 1. Characteristics of included papers.**

140 This table shows the characteristics of papers included in this scoping review.

| Authors, Year               | Country   | Type of Study | Participants                           | n                                                | Sex or Gender <sup>a</sup>                                                                                    | Age in Years                                                                            |
|-----------------------------|-----------|---------------|----------------------------------------|--------------------------------------------------|---------------------------------------------------------------------------------------------------------------|-----------------------------------------------------------------------------------------|
| Adams, 2020(25)             | USA       | Pre-post      | Law enforcement officers               | 54                                               | Male 54.2%                                                                                                    | 40+ 58.3%                                                                               |
| Beiting, 2022(26)           | USA       | Pre-post      | Health professionals                   | 51                                               | Female 92%                                                                                                    | 35-64 79%                                                                               |
| Bergeria, 2019(27)          | USA       | Pre-post      | People with lived or living experience | Presentation: 61<br>Presentation and Quiz: 58    | Presentation:<br>Male 57%<br><br>Presentation and Quiz:<br>Male 56%                                           | Presentation:<br>Mean 34,7 (SD 11.4)<br><br>Presentation and Quiz:<br>Mean 35 (SD 10.8) |
| Berland, 2019(28)           | USA       | Pre-post      | Medical students                       | In-person: 130<br><br>Online: 127                | N/A                                                                                                           | N/A                                                                                     |
| Brown, 2023(29)             | USA       | Descriptive   | Undergraduate and graduate students    | N/A                                              | N/A                                                                                                           | N/A                                                                                     |
| Castillo, 2022(30)          | USA       | Pre-post      | Nurse practitioners                    | 7                                                | N/A                                                                                                           | N/A                                                                                     |
| Cerles, 2021(31)            | USA       | Pre-post      | First responders                       | Pilot: 9<br><br>Intervention: 18                 | Pilot:<br>Male 78%, Female 22%<br><br>Intervention:<br>Male 61%, Female 39%                                   | Pilot:<br>25-44 56%<br><br>Intervention:<br>25-44 72%                                   |
| Eukel, 2020(32)             | USA       | Pre-post      | Health professionals                   | 187                                              | Female 78.5%, Male 21.5%                                                                                      | N/A                                                                                     |
| Farrugia, 2022(33)          | Australia | Descriptive   | Anyone interested                      | N/A                                              | Female 60.7%, Male 35.2%<br>Non-binary 1.9%, Other 3.9%                                                       | 30+ 90.3%                                                                               |
| French, 2021(34)            | USA       | Descriptive   | Anyone interested                      | 422                                              | Cisgender women 54%                                                                                           | Mean 33.3 (SD 11.8)                                                                     |
| Galiher & Huffman, 2022(35) | USA       | Pre-post      | Anyone interested                      | 219                                              | Male 28.8%, Female 71.2%                                                                                      | 25-34 31.5%                                                                             |
| Giordano, 2020(36)          | USA       | Pre-post      | Nursing students                       | Hybrid simulation: 31<br><br>Virtual reality: 19 | Hybrid simulation:<br>Female 93.5%<br><br>Virtual Reality:<br>Female 94.7%                                    | Hybrid simulation:<br>Mean 21.06<br><br>Virtual Reality:<br>Mean 21.06                  |
| Giordano, 2023(37)          | USA       | Pre-post      | Nursing students                       | Virtual reality: 11<br><br>Videoconferencing: 6  | Virtual reality:<br>Male 0%, Female 91%, Other 9%<br><br>Videoconferencing:<br>Male 17%, Female 83%, Other 0% | Virtual reality:<br>Mean 26.7<br><br>Videoconferencing:<br>Mean 25.9                    |

| Authors, Year               | Country | Type of Study     | Participants                                             | n                                              | Sex or Gender <sup>a</sup>                                                                                                                                                                 | Age in Years                                                                                            |
|-----------------------------|---------|-------------------|----------------------------------------------------------|------------------------------------------------|--------------------------------------------------------------------------------------------------------------------------------------------------------------------------------------------|---------------------------------------------------------------------------------------------------------|
| Goss, 2021(38)              | USA     | Pre-post          | Medical students                                         | In-person: 97<br>Online: 62                    | 2018 (in-person):<br>Ratio Male:Female 0.75 + 1 prefer not to say<br><br>2019 (in-person):<br>Ratio Male:Female 0.81 + 1 prefer not to say<br><br>2020 (online):<br>Ratio Male:Female 1.38 | 2018 (in-person):<br>Mean 23.3<br><br>2019 (in-person):<br>Mean 23.7<br><br>2020 (online):<br>Mean 24.5 |
| Hohmann, 2022(39)           | USA     | RCT               | Pharmacists                                              | Control: 32<br>Intervention: 32                | Control:<br>Male 19.4%, Female 80.6%<br><br>Intervention:<br>Male 19.4%, Female 77.4%                                                                                                      | Control:<br>Mean 40.4 (SD 10.3)<br><br>Intervention:<br>Mean 43.7 (SD 9.1)                              |
| Hughes, 2022(40)            | USA     | Descriptive       | People with lived or living experience                   | 90                                             | N/A                                                                                                                                                                                        | N/A                                                                                                     |
| Huhn, 2018(41)              | USA     | Pre-post          | People currently prescribed an opioid medication         | Presentation: 97<br>Presentation and Quiz: 100 | Presentation:<br>Female 39.2%<br><br>Presentation and Quiz:<br>Female - 51.0%                                                                                                              | Presentation:<br>Mean 32.7 (SD 11.1)<br><br>Presentation and Quiz:<br>Mean 33.7 (SD 11.6)               |
| Jensen, 2019(42)            | USA     | Descriptive       | Veterans                                                 | In-person: 313<br>Videoconferencing: 84        | In-person:<br>Female 6%, Male 94%<br><br>Videoconferencing:<br>Female 5.8, Male 94.2%                                                                                                      | In-person:<br>60+ 53.6%<br><br>Videoconferencing:<br>60+ 55.3%                                          |
| Kim, 2016(43)               | USA     | Non-randomized CT | Medical residents                                        | Reading-only: 11<br>Intervention: 12           | Reading-only:<br>Female 45%<br><br>Intervention:<br>Female 33%                                                                                                                             | N/A                                                                                                     |
| Mathias, 2023(44)           | USA     | Descriptive       | Anyone interested                                        | 1,982                                          | Women 57.8%, Men 15.5%,<br>Other 0.4%, Unknown 26.3%                                                                                                                                       | 25-34 18.2%<br>Unknown 26.5%                                                                            |
| Millikan, 2021(45)          | USA     | Pre-post          | Adolescents                                              | 8                                              | Female 50%, Male 25%,<br>Unknown 25%                                                                                                                                                       | Range 11-17<br>Mean 14.3                                                                                |
| Moses, 2021(46)             | USA     | Pre-post          | First-year medical students                              | In-person: 124<br>Online: 238                  | In-person:<br>Female 50%<br><br>Online:<br>Female 49.6%                                                                                                                                    | In-person:<br>Mean 23.4 (SD 2.2)<br><br>Online:<br>Mean 23.3 (SD 2.5)                                   |
| Roe & Banta-Green, 2016(47) | USA     | Descriptive       | Anyone interested                                        | 422                                            | Female 65%                                                                                                                                                                                 | 35+ 57%                                                                                                 |
| Rothbauer, 2022(48)         | USA     | Descriptive       | Veterans with specified opioid prescription risk factors | 160                                            | Male 90%                                                                                                                                                                                   | Mean 65                                                                                                 |
| Simmons, 2016(49)           | USA     | Pre-post          | Professional first responders                            | 1,697                                          | N/A                                                                                                                                                                                        | N/A                                                                                                     |
| Simmons, 2018(50)           | USA     | Pre-post          | Anyone interested                                        | 311                                            | N/A                                                                                                                                                                                        | N/A                                                                                                     |

| Authors, Year                         | Country | Type of Study | Participants                                                     | n                                                                                                                                                                                             | Sex or Gender <sup>a</sup>                                                                                                               | Age in Years                                                                                                   |
|---------------------------------------|---------|---------------|------------------------------------------------------------------|-----------------------------------------------------------------------------------------------------------------------------------------------------------------------------------------------|------------------------------------------------------------------------------------------------------------------------------------------|----------------------------------------------------------------------------------------------------------------|
| <b>Sisson, 2023a and 2023b(23,24)</b> | USA     | RCT           | People with lived or living experience                           | 2023a (completed the opioid use questionnaire): 304<br><br>2023b (completed training): Opioid poisoning education and naloxone distribution (OPEND): 48<br><br>Opioid poisoning education: 50 | 2023a:<br>Female 53%, Male 47%<br><br>2023b:<br>OPE:<br>Female 30.6%, Male 19.8%<br><br>OPEND:<br>Female 31.5%, Male 18%<br>Unknown 3.6% | 2023a:<br>Mean 37.5 (SD 9.55)<br><br>2023b:<br>OPE:<br>Mean 38.5 (SD 10.5)<br><br>OPEND:<br>Mean 37.4 (SD 9.1) |
| <b>Waldron, 2022(51)</b>              | USA     | Pre-post      | School workers                                                   | 28                                                                                                                                                                                            | Female 67.9%, Male 28.6%<br>Unknown 3.6%                                                                                                 | Range 26-62<br>Mean 46.33 (SD 10.05)                                                                           |
| <b>Wu, 2021(52)</b>                   | USA     | Descriptive   | Patients receiving prescription opioids                          | 164                                                                                                                                                                                           | Male 92%, Female 8%                                                                                                                      | 60-69 39%                                                                                                      |
| <b>Yang, 2021(53)</b>                 | USA     | Descriptive   | People with lived or living experience, their friends and family | 3,926                                                                                                                                                                                         | Male - 34%, Female 61%,<br>Gender nonconforming or nonbinary 4%,<br>Transgender 1%                                                       | 26-45 60%                                                                                                      |
| <b>Yates et al., 2018(54)</b>         | USA     | Descriptive   | Veterans receiving prescription opioids                          | 41                                                                                                                                                                                            | Male 97.6%                                                                                                                               | Mean 61                                                                                                        |

141 <sup>a</sup>All papers reported 'biological sex' except for Mathias 2023, Farrugia 2022, French 2021, and Yang 2021.

## Participant Demographics

Eight of the included studies (26%) referred to interventions that were designed specifically for people with lived or living experiences (PWLLE) of opioid use, six (19%) broadened to anyone interested in participating, including laypersons, and other six (19%) focused on medical, nursing and pharmacy students. The remainder of the studies involved health professionals (n=5), family members or friends of PWLLE (n=2), first responders (n=2), school workers (n=1), and law enforcement officers (n=1).

Of the 31 studies analyzed, fourteen (45%) reported on the mean age of the participants. The ages ranged from 11 to 69 years old, with most of the participants aged between 25 and 64 years. Of the included studies, 21 (68%) reported biological sex and not gender, with ten of these which reported male and female options. There was notable variation in participation based on biological sex, with thirteen studies (42%) primarily comprised of female participants, and nine (29%) of male participants. Four studies (13%) included an option for participants to report their gender, while six (19%) did not report any sex or gender information.

Data on race or ethnicity were not reported in thirteen (42%) of the studies. Three studies (10%) reported the percentage of one racial identity in their results, with Beiting et al, 2022 reporting the percentage of Black individuals, while Yates et al., 2018 and Moses et al., 2021 reported the percentage of White individuals. It is worth noting that all of the 18 studies reporting race or ethnicity identity, and had White or Caucasian participants as the majority(23,25,26,31,34–37,39,42,44–46,52–55).

No papers provided information on participants' socioeconomic status. However, Huhn et al., 2018 reported that the median household income of participants was US\$52,500, while Sisson 2023a reported that most participants had an annual household income between US\$10,000 and US\$49,000. Participants educational level was available in six (19%) studies, with three

reporting most participants had a high school degree(23,27,55), two reporting most had a college degree(35,51), and two reporting most had a graduate degree or higher(32,39). The geographical area in which the participants resided was mentioned in six studies. Most participants were from urban areas(28,36,37,39), while two studies focused on rural areas(30,51).

## **Intervention Approaches**

Several strategies were employed for conducting remote and virtual OPEND. A summary of intervention approaches is specified in [Table 2](#). A significant number of these studies (n=25, 81%) delivered interventions over the internet, including videos (n=9), videoconferencing (n=7), courses (n=5), slide presentations (n=3), and content on websites (n=3). Of these, four studies additionally provided naloxone by mail. There were four telephone-based interventions, all of which were coupled with mail-delivered naloxone.

## 178 Table 2. Intervention characteristics and key findings.

179 This table shows details and key findings of the interventions addressed in this review.

| Authors, Year                     | Intervention Details <sup>a</sup>                                                                       | Duration in minutes <sup>b</sup>                          | Scales used                                                                               | Findings                                                                                                                                                                                                                                                                                                                                                                                                                                            |
|-----------------------------------|---------------------------------------------------------------------------------------------------------|-----------------------------------------------------------|-------------------------------------------------------------------------------------------|-----------------------------------------------------------------------------------------------------------------------------------------------------------------------------------------------------------------------------------------------------------------------------------------------------------------------------------------------------------------------------------------------------------------------------------------------------|
| <b>Asynchronous interventions</b> |                                                                                                         |                                                           |                                                                                           |                                                                                                                                                                                                                                                                                                                                                                                                                                                     |
| <b>Adams, 2020(25)</b>            | Video and quiz with corrected feedback                                                                  | 15 to 25                                                  | Self-developed                                                                            | <ul style="list-style-type: none"> <li>Increased knowledge about opioids and opioid use disorder</li> <li>Increased confidence in working with people who use opioids</li> <li>Improved attitudes around opioid use disorder</li> <li>Decreased stigma around opioid use disorder</li> <li>Participants found the training easy and interesting, and would share with others</li> </ul>                                                             |
| <b>Bergeria, 2019(27)</b>         | Slide presentation (or presentation and quiz with corrected feedback)                                   | Presentation: M=27.4<br><br>Presentation and quiz: M=36.4 | BOOK <sup>a</sup>                                                                         | <ul style="list-style-type: none"> <li>Increased knowledge about opioid poisoning</li> <li>Decreased some opioid poisoning-risk behaviours</li> <li>No significant differences in intervention acceptability</li> </ul>                                                                                                                                                                                                                             |
| <b>Berland, 2019(28)</b>          | Course with four online modules (or in-person intervention)                                             | Not mentioned                                             | OOKS <sup>b</sup> (adapted)<br>OOAS <sup>c</sup> (adapted)<br>MCRS <sup>d</sup> (adapted) | <ul style="list-style-type: none"> <li>Knowledge and Preparedness increased significantly in both groups</li> <li>No significant change in Attitudes scores in either group</li> <li>Participants from both groups were satisfied with the training</li> </ul>                                                                                                                                                                                      |
| <b>Castillo, 2022(30)</b>         | Slide presentation                                                                                      | 20                                                        | N/A                                                                                       | <ul style="list-style-type: none"> <li>Increased confidence in discussing naloxone as a harm reduction strategy and in identifying patients who may be at risk of opioid poisoning</li> <li>Increased motivation and intent to use naloxone</li> <li>Perceived barriers did not have an impact on willingness to prescribe naloxone</li> <li>Decreased stigma around prescribing naloxone</li> <li>Participants enjoyed the intervention</li> </ul> |
| <b>Cerles, 2021(31)</b>           | <a href="https://rb.gy/sqiyo">Video series</a> (available at rb.gy/sqiyo)                               | 20                                                        | N/A                                                                                       | <ul style="list-style-type: none"> <li>Immediate increase in knowledge and confidence</li> <li>Knowledge was not sustained at the three-month follow-up</li> <li>Videos received an average rating of 4.9 out of 5</li> </ul>                                                                                                                                                                                                                       |
| <b>Eukel, 2020(32)</b>            | On-demand <a href="https://one-program.org">course</a> with five modules (available at one-program.org) | 180                                                       | Not mentioned                                                                             | <ul style="list-style-type: none"> <li>Increased knowledge</li> <li>Change in pharmacists' practice behaviours</li> <li>Significant impacts on performance up to 12 months</li> <li>Overall training rating was 2.7 out of 3</li> <li>Naloxone was prescribed to 18.2% of patients based on risk stratification, with 60% acceptance rate</li> </ul>                                                                                                |

| Authors, Year                          | Intervention Details <sup>a</sup>                                                                                | Duration in minutes <sup>b</sup>                                              | Scales used                                      | Findings                                                                                                                                                                                                                                                                                                                                                                                                                       |
|----------------------------------------|------------------------------------------------------------------------------------------------------------------|-------------------------------------------------------------------------------|--------------------------------------------------|--------------------------------------------------------------------------------------------------------------------------------------------------------------------------------------------------------------------------------------------------------------------------------------------------------------------------------------------------------------------------------------------------------------------------------|
| <b>Farrugia, 2022(33)</b>              | <a href="#">Website</a> (available at <a href="#">overdoselivesavers.org</a> )                                   | Not reported                                                                  | N/A                                              | <ul style="list-style-type: none"> <li>Increased knowledge and confidence in discussing opioid poisoning emergencies</li> <li>Strong dissemination and reach</li> <li>Most participants visited the website for professional reasons</li> <li>The most helpful section was the personal stories</li> <li>Endorsement from alcohol and other drug sectors</li> </ul>                                                            |
| <b>French, 2021(34)</b>                | <a href="#">Video</a> + mail-delivered naloxone (available at <a href="#">nextdistro.org</a> )                   | Not mentioned                                                                 | N/A                                              | <ul style="list-style-type: none"> <li>Most participants had proximity to opioid poisoning</li> <li>Most frequently reported barriers to access naloxone through other means were COVID quarantine, lack of knowledge on how to access, cost, transportation, COVID-related health concerns, and stigma</li> <li>Most common ways individuals learned about the program were through social media and word of mouth</li> </ul> |
| <b>Galiher &amp; Huffman, 2022(35)</b> | <a href="#">Video</a> (available at <a href="#">rb.gy/lwrjs</a> )                                                | 6.5                                                                           | OOAS <sup>e</sup> (adapted)                      | <ul style="list-style-type: none"> <li>Improved self-perception of ability to manage opioid poisoning emergencies</li> <li>Virtual programming could potentially decrease accessibility issues</li> </ul>                                                                                                                                                                                                                      |
| <b>Giordano, 2020(36)</b>              | Virtual reality video (or hybrid)                                                                                | 20                                                                            | OOKS <sup>d</sup><br>OOAS <sup>e</sup>           | <ul style="list-style-type: none"> <li>There was no change in knowledge and attitudes</li> <li>Participants in both groups performed similarly regarding knowledge and attitudes towards providing care during an opioid poisoning</li> </ul>                                                                                                                                                                                  |
| <b>Giordano, 2023(37)</b>              | Virtual reality <a href="#">video</a> (available at <a href="#">virtualinnovation.org</a> ) (or videoconference) | Video: 9<br><br>Videoconferencing: 90                                         | OOKS <sup>d</sup><br>OOAS <sup>e</sup>           | <ul style="list-style-type: none"> <li>Both groups improved their attitudes and knowledge about responding to opioid poisoning</li> <li>Both groups decreased stigma toward people with opioid use disorder</li> <li>Both groups improved preparedness</li> <li>No statistically significant difference between methods</li> </ul>                                                                                             |
| <b>Goss, 2021(38)</b>                  | Video (or in-person) + Q&A via Zoom                                                                              | Video: 50<br><br>Zoom: 30                                                     | OOKS <sup>d</sup><br>OOAS <sup>e</sup> (adapted) | <ul style="list-style-type: none"> <li>Both groups improved knowledge and attitudes toward opioid use and poisoning</li> <li>Both groups decreased stigma toward people with opioid use disorder</li> </ul>                                                                                                                                                                                                                    |
| <b>Huhn, 2018(41)</b>                  | Slide presentation (or presentation and quiz with corrective feedback)                                           | Presentation: M=21.5<br>SD=12.3<br><br>Presentation and Quiz: M=34.7<br>SD=14 | BOOK <sup>c</sup>                                | <ul style="list-style-type: none"> <li>Increased knowledge in both groups</li> <li>High level of acceptability for the intervention in both groups</li> <li>Participants in the Presentation group were more likely than participants in the Presentation and Quiz group to complete the intervention</li> </ul>                                                                                                               |
| <b>Kim, 2016(43)</b>                   | Course with one module (or reading-only)                                                                         | Mdn=22.5                                                                      | Self-developed                                   | <ul style="list-style-type: none"> <li>Increased knowledge for both groups, with internet-based participants scoring better than the control group</li> <li>No statistical difference between the groups in the global assessment</li> </ul>                                                                                                                                                                                   |



| Authors, Year                  | Intervention Details <sup>a</sup>                        | Duration in minutes <sup>b</sup> | Scales used                                                | Findings                                                                                                                                                                                                                                                                                                                                                                                                                                                                                                                                                                                                                                                                                                                                                                                                                                                                                                                                                                                            |
|--------------------------------|----------------------------------------------------------|----------------------------------|------------------------------------------------------------|-----------------------------------------------------------------------------------------------------------------------------------------------------------------------------------------------------------------------------------------------------------------------------------------------------------------------------------------------------------------------------------------------------------------------------------------------------------------------------------------------------------------------------------------------------------------------------------------------------------------------------------------------------------------------------------------------------------------------------------------------------------------------------------------------------------------------------------------------------------------------------------------------------------------------------------------------------------------------------------------------------|
| Roe & Banta-Green, 2016(47)    | <a href="#">Website</a> (available at stopoverdose.org)  | Not reported                     | Self-developed                                             | <ul style="list-style-type: none"> <li>Most respondents were able to correctly identify basic signs of opioid poisoning and appropriate responses</li> <li>No differences in knowledge scores between respondents indicating professional or personal interest</li> <li>Respondents from the personal interest group were more likely to report being very likely to obtain naloxone</li> <li>Respondents had poor understanding of the local Good Samaritan law</li> <li>Great number of respondents reached with only a month's worth of paid advertising</li> </ul>                                                                                                                                                                                                                                                                                                                                                                                                                              |
| Simmons, 2016(49)              | <a href="#">Course</a> (available at getnaloxonenow.org) | 45                               | OOKS <sup>d</sup> (adapted)<br>OOAS <sup>e</sup> (adapted) | <ul style="list-style-type: none"> <li>After the training, 88.1% of participants felt they had the knowledge and skills to intervene in a poisoning emergency</li> <li>Most trainees were satisfied or very satisfied with the training content, format, and mode of delivery</li> <li>Increased preparedness to administer naloxone</li> <li>Increased motivation to administer naloxone</li> <li>After the training, participants administered naloxone in 88 emergencies, with a 78.4% success rate of reversal</li> </ul>                                                                                                                                                                                                                                                                                                                                                                                                                                                                       |
| Simmons, 2018(50)              | <a href="#">Course</a> (available at getnaloxonenow.org) | 20                               | OOKS <sup>d</sup> (adapted)<br>OOAS <sup>e</sup> (adapted) | <ul style="list-style-type: none"> <li>After the training, 89% of participants felt they had the knowledge and confidence to intervene in a poisoning emergency</li> <li>More than 80% of participants were highly satisfied with the training</li> <li>While 71.7% of the participants expressed interest in obtaining naloxone post-training, 30.2% reported attempting to do so</li> <li>Reported barriers to obtaining naloxone included: not being sure how to obtain it, inability to get a prescription, lack of availability, and cost</li> </ul>                                                                                                                                                                                                                                                                                                                                                                                                                                           |
| Sisson, 2023a and 2023b(23,24) | Video + mail-delivered naloxone (or video-only)          | 20                               | OOKS <sup>d</sup> (adapted)<br>OOAS <sup>e</sup> (adapted) | <p>2023a:</p> <ul style="list-style-type: none"> <li>Strong retention rates</li> <li>Mean satisfaction score of 94.63%</li> <li>Most participants in the OPEND group expressed high satisfaction upon receiving a naloxone kit, while a considerably smaller portion in the education-only group were equally content with just receiving information on how to obtain naloxone</li> </ul> <p>2023b:</p> <ul style="list-style-type: none"> <li>Increased knowledge of opioid poisoning and naloxone</li> <li>42% individuals in the education-only group reported obtaining their own naloxone kit</li> <li>16 participants reported using their naloxone over the three-month follow-up period, and utilization was evenly split between groups</li> <li>Most kits were used on friends or family members experiencing opioid poisoning</li> <li>All opioid poisoning reversals resulted in survival</li> <li>No difference in reported poisonings between groups at months 1, 2, or 3</li> </ul> |

| Authors, Year                    | Intervention Details <sup>a</sup>                                                                                    | Duration in minutes <sup>b</sup> | Scales used                                                | Findings                                                                                                                                                                                                                                                                                                                                                                                                                           |
|----------------------------------|----------------------------------------------------------------------------------------------------------------------|----------------------------------|------------------------------------------------------------|------------------------------------------------------------------------------------------------------------------------------------------------------------------------------------------------------------------------------------------------------------------------------------------------------------------------------------------------------------------------------------------------------------------------------------|
| Waldron, 2022(51)                | <a href="#">Video</a> (available at <a href="http://rb.gy/60j32">rb.gy/60j32</a> )                                   | 60 to 90                         | New General Self-Efficacy Scale (adapted)                  | <ul style="list-style-type: none"> <li>Increased knowledge of how to recognize and respond to an opioid emergency</li> <li>Increased confidence in recognizing and responding to an opioid emergency</li> <li>Almost all participants were highly satisfied with the content and methods</li> </ul>                                                                                                                                |
| Yang, 2021(53)                   | <a href="#">Website</a> + mail-delivered naloxone (available at <a href="http://nextdistro.org">nextdistro.org</a> ) | Not reported                     | N/A                                                        | <ul style="list-style-type: none"> <li>Substantial volume of new requests for naloxone via the website, most of which were fulfilled</li> <li>Instances of naloxone use during this period were largely successful in opioid poisoning reversal</li> </ul>                                                                                                                                                                         |
| <b>Synchronous interventions</b> |                                                                                                                      |                                  |                                                            |                                                                                                                                                                                                                                                                                                                                                                                                                                    |
| Beiting, 2022(26)                | Videoconference + mail-delivered naloxone                                                                            | Not reported                     | Self-developed                                             | <ul style="list-style-type: none"> <li>Increased knowledge regarding the opioid epidemic</li> <li>Increased confidence in recognizing poisoning and administering naloxone</li> <li>More participants would prefer in-person training, but most were comfortable with a virtual format</li> </ul>                                                                                                                                  |
| Hohmann, 2022(39)                | Videoconference (or no intervention)                                                                                 | 90                               | OOKS <sup>d</sup> (adapted)<br>OOAS <sup>e</sup> (adapted) | <ul style="list-style-type: none"> <li>No difference in knowledge about naloxone, perceived barriers to implementation of naloxone, and attitudes towards naloxone</li> <li>Improved confidence regarding naloxone implementation and logistics</li> <li>Increased intention to provide naloxone</li> <li>Increased naloxone prescriptions only in the intervention group</li> </ul>                                               |
| Hughes, 2022(40)                 | Telephone + mail-delivered naloxone                                                                                  | Not mentioned                    | N/A                                                        | <ul style="list-style-type: none"> <li>33% of potential participants were reached</li> <li>55% accepted the educational intervention</li> <li>93% agreed to receive a naloxone kit</li> </ul>                                                                                                                                                                                                                                      |
| Jensen, 2019(42)                 | Videoconference (or in-person)                                                                                       | 60                               | N/A                                                        | <ul style="list-style-type: none"> <li>21% of naloxone prescriptions were acquired because of the videoconference group during the first 6 months of the service, and 78% of these were attending online sessions</li> <li>Effective at reaching patients who were deemed high-risk and lived in remote locations</li> </ul>                                                                                                       |
| Mathias, 2023(44)                | Videoconference                                                                                                      | 120                              | N/A                                                        | <ul style="list-style-type: none"> <li>Increased participation</li> <li>Reached urban population centres, rural areas, and substantial racial/ethnic diversity</li> </ul>                                                                                                                                                                                                                                                          |
| Millikan, 2021(45)               | Videoconference                                                                                                      | 45                               | Not mentioned                                              | <ul style="list-style-type: none"> <li>Increased knowledge and awareness about opioids, opioid misuse, opioid poisoning risks, and how to recognize the signs of opioid poisoning</li> <li>100% of participants stated they were less likely to misuse prescription opioids or heroin</li> <li>87.5% of participants reported they were more likely to talk to someone if they are concerned about themselves or others</li> </ul> |

| Authors, Year              | Intervention Details <sup>a</sup>   | Duration in minutes <sup>b</sup> | Scales used                                                                         | Findings                                                                                                                                                                                                                                                                                                                                                                                                                             |
|----------------------------|-------------------------------------|----------------------------------|-------------------------------------------------------------------------------------|--------------------------------------------------------------------------------------------------------------------------------------------------------------------------------------------------------------------------------------------------------------------------------------------------------------------------------------------------------------------------------------------------------------------------------------|
| <b>Moses, 2021(46)</b>     | Videoconference (or in-person)      | 60                               | OOKS <sup>d</sup><br>OOAS <sup>e</sup><br>MCRS <sup>f</sup><br>NaRRC-B <sup>g</sup> | <ul style="list-style-type: none"> <li>Increased knowledge overall, with greater knowledge improvement in the in-person group</li> <li>Improved attitudes toward naloxone use and distribution in both groups</li> <li>A 'hands-on' component was still desired by many students</li> <li>97.2% of participants from both groups enjoyed the training and 99.4% believed future classes should receive a similar training</li> </ul> |
| <b>Rothbauer, 2022(48)</b> | Telephone + mail-delivered naloxone | M=5<br>Mdn=5                     | N/A                                                                                 | <ul style="list-style-type: none"> <li>73.8% of potential participants were reached on the first or second attempt; of those, 78% accepted the naloxone kit</li> <li>The most common reason to not accept the kit was feeling naloxone was unnecessary</li> <li>Pharmacy students conducting the calls reported satisfaction with the program and expressed interest in continuing</li> </ul>                                        |
| <b>Wu, 2021(52)</b>        | Telephone + mail-delivered naloxone | M=14                             | Not mentioned                                                                       | <ul style="list-style-type: none"> <li>67% of potential participants were reached; of those, 73% accepted naloxone</li> <li>Most patients were reached within one attempt</li> </ul>                                                                                                                                                                                                                                                 |
| <b>Yates, 2018(54)</b>     | Telephone + mail-delivered naloxone | Not mentioned                    | N/A                                                                                 | <ul style="list-style-type: none"> <li>Most participants were successfully contacted within 3 attempts; of those, 63.4% accepted naloxone</li> <li>Participants preferred the nasal formulation instead of intramuscular</li> </ul>                                                                                                                                                                                                  |

180 <sup>a</sup>When available, hyperlinks and URLs to interventions are provided.

181 <sup>b</sup>Duration is approximate.

182 <sup>c</sup>Brief Opioid Overdose Knowledge (BOOK) Questionnaire.

183 <sup>d</sup>Opioid Overdose Knowledge Scale (OOKS).

184 <sup>e</sup>Opioid Overdose Attitudes Scale (OOAS).

185 <sup>f</sup>Medical Condition Regard Scale (MCRS).

186 <sup>g</sup>Naloxone-Related Risk Compensation Beliefs Scale (NaRRC-B).

Among the 27 studies that reported on the duration of the intervention, the educational components ranged from five minutes to two hours, with interventions typically lasting 20 minutes (n=6, 19%). Four studies (13%) used a self-directed approach, in which participants could complete the intervention in their own time(30,32,33,47). Of the self-directed interventions, one reported the average amount of time taken for participants to complete their training, and none reported drop-out rates.

The 31 studies analyzed in this review incorporated a variety of educational elements in their interventions. The predominant theme among the educational components analyzed was how to respond to, followed by how to recognize, and how to prevent opioid poisoning emergencies. Typical opioid poisoning response steps were sporadically mentioned across different interventions, with the most often mentioned being naloxone administration and calling 911. Other themes found within the interventions included history and statistics on opioid poisoning, laws and law enforcement, specifics on naloxone use, and stigma. An overview of the educational components can be seen in [Table 3](#).

### **Table 3. Thematic Analysis of Educational Components.**

This table shows a thematic analysis of the topics mentioned in the educational portion of the interventions.

| Major Themes <sup>a</sup>                  | Subthemes                                         | References |
|--------------------------------------------|---------------------------------------------------|------------|
| Statistics and History of Opioid Poisoning |                                                   | 8          |
| Prevention of Opioid Poisoning             | Opioid poisoning risks                            | 8          |
|                                            | Contamination by fentanyl and/or other substances | 2          |
| Recognizing an Opioid Poisoning            |                                                   | 19         |
| Responding to an Opioid Poisoning          | PPE and situational awareness                     | 2          |
|                                            | Calling 911                                       | 7          |
|                                            | Airway and circulation assessment                 | 1          |
|                                            | Sternal rub                                       | 1          |
|                                            | Naloxone administration                           | 22         |
|                                            | Rescue breathing                                  | 3          |
|                                            | Recovery positioning                              | 4          |
|                                            | Opioid withdrawal management                      | 3          |
|                                            | Continued monitoring until EMS arrives            | 3          |

|                                      |                                  |   |
|--------------------------------------|----------------------------------|---|
| <b>Laws and Law Enforcement</b>      | Barriers to calling 911          | 2 |
|                                      | Good Samaritan Law               | 5 |
|                                      | Naloxone Access Law              | 2 |
| <b>Naloxone Specifics</b>            | Intranasal vs. intramuscular use | 1 |
|                                      | Mechanism of action              | 2 |
|                                      | Access and availability          | 1 |
|                                      | Storage and expiration           | 1 |
| <b>Stigma about Opioid Poisoning</b> |                                  | 6 |

<sup>a</sup>Themes were identified based on information reported in papers, or through direct revision of original educational materials, when available.

Most studies utilized a pre-post design or post-training questionnaires. Out of the 31 studies analyzed, 19 (61%) reported on the level of knowledge individuals possessed regarding opioid poisoning response, followed by 12 (39%) on attitudes and behaviour towards opioid poisoning emergencies, 11 (36%) on qualitative feedback about the intervention, and 10 (33%) on the number of naloxone kits that were distributed, prescribed, or obtained during the intervention. Other outcomes assessed were confidence in responding to an opioid poisoning emergency, comparisons between different modalities, accessibility of OPEND, changes in stigma, barriers to accessing or prescribing naloxone, preparedness, familiarity with virtual learning, and opioid use.

The Opioid Overdose Knowledge Scale (OOKS) and the Opioid Overdose Attitudes Scale (OOAS) were used in 10 out of 31 studies (32%). Eight studies used both scales, while two used either one of them. Three studies developed their own assessment tools, some drawing from various sources in the literature. The Brief Opioid Overdose Knowledge Questionnaire (BOOK) and the Medical Conditions Regard Scale (MCRS) were each used by two studies (6%).

## Key Findings

Findings are summarized in [Table 2](#).

### Videos (n=9)

Six studies reported an increase in knowledge immediately after the training(24,25,31,37,38,51). One of these collected longitudinal data, and knowledge was not sustained at the three-month follow-up(31). Three of the video interventions reported on attitudes around opioid use disorder (OUD) or providing care during an opioid poisoning(25,36,37), with one of them reporting no change(36) and the other two reporting an increase in positive attitudes. All four studies that assessed overall satisfaction and/or qualitative feedback reported high satisfaction rates regarding the content, teaching methods, format, and/or mode of delivery of the intervention (23,25,31,51). Other reported outcomes were increased confidence, self-perception of ability to manage opioid poisoning emergencies, and preparedness to recognize and respond to opioid poisoning, and decreased stigma around OUD.

### Videoconferencing (n=7)

Four studies reported an increase in knowledge about the use of naloxone and the opioid poisoning epidemic(26,37,45,46), and one reported no difference(39). Two papers reported improved attitudes toward naloxone use and distribution(37,46), while another reported no difference after the training(39). Two papers reported that most participants are comfortable with a virtual format but would prefer in-person training(26,46).

### Courses (n=5)

All studies reported increased knowledge and awareness about opioid poisoning(28,32,43,49,50). While one study reported a positive change in behaviour after the intervention(32), another study found no significant changes for attitudes pertaining to opioid

poisoning, as measured using the validated OOAS tool(28). Four papers that assessed satisfaction with the training reported high satisfaction rates(28,32,49,50). Simmons et al., 2016 reported that participants surveyed up to 9 months after the intervention successfully reversed an opioid poisoning with the use of naloxone in 78.4% of cases(49).

### **Slide presentations (n=3)**

All studies reported high levels of satisfaction and acceptability for their interventions(27,30,41). Two studies reported increased knowledge and one increased confidence about opioid use and poisoning after the intervention(27,30,41). One study found that the training was effective in decreasing stigma around prescribing naloxone(30). One study reported less opioid poisoning-risk behaviours after the intervention(27).

### **Websites (n=3)**

The types of assessments used in website interventions varied significantly. One study reported increased knowledge and confidence in discussing opioid poisoning(33), and another showed that most participants correctly identified basic signs of opioid poisoning and appropriate responses(47). One of the interventions reported that of the participants visiting the website, a majority indicated that they visited for professional reasons(33). Another intervention showed no difference in knowledge between participants that indicated professional or personal interest, with the personal interest group were more likely to obtain naloxone(47).

### **Telephone (n=4)**

All telephone-based interventions reported the percentage of participants successfully contacted through the intervention. In three of them, more than half were reached within one or two attempts(48,52,54).

## **Mail-delivered naloxone (n=8)**

Of the interventions that offered naloxone by mail, four were telephone-based(40,48,52,54), two used videos(23,24,34), one used videoconference(26), and one used a website(53). Four studies reported acceptability rates for naloxone kits ranging from 73% to 93%(40,48,52,54). Among participants that did not accept naloxone, one study reported the most common reason was feeling it was unnecessary(48). One study reported on barriers to accessing naloxone through means other than the intervention, with the most frequently reported barriers being the COVID-19 epidemic, lack of knowledge on how to access naloxone, cost, transportation, and stigma(34). Two papers reported the result of participants' naloxone use – both papers reported that most or all opioid poisoning reversals resulted in survival, and one paper reported that a majority of kits were used on friends or family members(24,53).

## **Comparison between different modalities (n=12)**

[Table 2](#) indicates which studies had comparison groups. Four studies had a control group involving in-person training(28,38,42,46), and one study had a hybrid group(36). Of these, three showed no significant differences on preparedness, attitudes, satisfaction, and stigma scores between formats(28,36,38), and one reported greater knowledge in the in-person group(46). One study reported a significantly higher number of naloxone prescriptions obtained by participants in the virtual group(42). For papers with other comparison groups, there was no significant differences in Kim et al., 2016 between reading-only and course groups, in Bergeria et al., 2019 for slide presentation and slide plus quiz groups, and in Giordano et al., 2023 between virtual reality video and videoconference groups(27,37,43). Huhn et al., 2018 showed the presentation-only group were more likely to complete the intervention compared to the group that received the same presentation coupled with a quiz, but there were no differences in knowledge and intervention acceptability(41). Sisson et al., 2023a reported higher satisfaction in the naloxone distribution group compared to the group without naloxone distribution(55). Sisson



et al, 2023b reported that 42% of individuals in the group without naloxone distribution obtained their own kit(24). In a comparison between a videoconference intervention and no intervention, Hohmann et al., 2022 showed an increase in the number of naloxone prescriptions obtained by participants only in the intervention group, but there was no difference related to other outcomes(39).

## **Limitations**

The included studies reported on limitations in their designs. Commonly reported limitations included lack of generalizability of their study results, reported in 21 studies(23–31,36–39,44–50,52,54). A frequent obstacle reported in 12 studies is small sample size, which ranged from six to 313 participants per group(25–27,30,31,36,37,42,45,48,51). Other limitations include the absence of longitudinal data(26,34,39,41,45,47,52), self-reported bias for questionnaires(23,24,46,49,50), the lack of comparison to an in-person intervention(35,38,41,44), no follow-up on the number of participants who responded to an opioid poisoning post-intervention(34,42,44,52), lack of validity of the tools used(25,30,32), low response rates, which were of 21.2% and 33.7%(32,50), and the lack of randomization(43,44).

## Discussion

This scoping review identified that there is considerable research and innovation underway in the development and evaluation of virtual OPEND, particularly since the start of the COVID-19 pandemic. Overall, virtual OPEND appears to be acceptable to participants and effective in increasing knowledge on how to respond to an opioid poisoning, as well as improving attitudes and decreasing stigma about people who use opioids. Especially when coupled with naloxone distribution, programs appear to impact the motivation and willingness of people to respond to these emergencies. Two studies demonstrated successful resuscitations and decreased poisoning death rates(23,24,49), showing that virtual OPEND can be a life-saving intervention.

Our analysis indicates that most interventions are primarily targeted at PWLLE of opioid use and potential bystanders, defined as individuals who could potentially witness an opioid poisoning. A cross-sectional web-based survey and a mixed-methods study have demonstrated the unique position of bystanders in reversing opioid poisonings and saving lives, provided they are equipped with naloxone and the knowledge to administer it effectively(56,57).

However, the bulk of these studies are based in the USA, with only one study conducted in Australia(33). Opioid poisoning is a global concern, demonstrating a pressing need to implement and evaluate virtual OPEND programs worldwide to increase access to this intervention(2). There is also a need for more randomized trials, since only two included studies used this design. Few studies had a longitudinal design; however, it is essential to assess the attrition of knowledge acquired in these interventions and the potential need for retraining.

In addition, only 42% of studies utilized validated scales to measure outcomes related to opioid poisoning, and 62% of those studies modified already validated tools for their study. The validated scales were originally designed to assess illicit opioid poisoning risk factors and do not

include knowledge about naloxone(58,59). Therefore, there is a critical demand for updated and validated survey instruments to effectively evaluate these interventions(58,59).

Few studies reported sociodemographic variables and focused on the inclusion of historically marginalized populations. Yet, those more likely to be impacted by the opioid poisoning crisis include people living in rural and remote areas, individuals experiencing homelessness, those living in poverty, incarcerated individuals, and Black, Indigenous, and People of Colour(60). Without sociodemographic information, it is unknown whether sampling and selection biases and issues with representativeness have occurred, limiting the effectiveness of these interventions in addressing health inequities(61).

Most interventions did not make their training materials publicly available, and some of them did not specify the educational content included in the intervention, hindering the potential for public dissemination and research replication. Among the studies that reported the content of their training, stigma reduction and policies pertaining to witness protection and naloxone permission for opioid poisoning reversal were frequently not addressed, which if included, could have bolstered the outcomes(62,63).

This is the first scoping review on the outcomes of fully virtual OPEND interventions. Other reviews have explored opioid poisoning interventions and their effectiveness. Pellegrino et al., 2021 has conducted a scoping review on first aid educational interventions for opioid poisoning published until 2019, showing the potential of these programs despite the sparsity and lack of quality of the studies reviewed(11). Razaghizad et al., 2021, an umbrella review on OPEND, demonstrated that there is credible evidence that opioid poisoning education programs improve knowledge and attitudes, enable participants to use naloxone safely and effectively, and reduce opioid-related mortality(10). Additionally, Tas et al., 2022 reviewed technological interventions that prevent, detect, or respond to opioid poisoning emergencies, with promising approaches that were still under development(64). Our findings suggest the potential effectiveness of virtual

OPEND interventions and can assist researchers and public health practitioners to design, implement, and evaluate future virtual and remote OPEND programs. Moreover, our findings suggest the urgent need for more rigorous research of virtual OPEND programs, which have the potential to save lives. Our recommendation includes providing resources and conditions to amplify these educational programs coupled with naloxone distribution as a health care tool to reduce opioid-related harms and inequities worldwide. Future research is recommended, especially in developing relevant evaluation tools that can better assess OPEND's effectiveness for diverse outcomes. Longitudinal clinical trials are also encouraged to address the attrition of knowledge and more controlled settings.

## Limitations

Our review has limitations. One such limitation is the lack of extensive critical appraisal of the studies included. Despite our best efforts to design a comprehensive search strategy without imposing any limitations, the constant updates and rapid publication of new research on technology-based interventions may result in the unintentional omission of significant studies. We also acknowledge that many impactful programs addressing the opioid poisoning crisis are currently available online but did not involve a research design or share publicly available data on these interventions, therefore were not suitable for this review. Additionally, the lack of detailed information about the interventions in many studies may have impacted the accuracy of our synthesis, as we did not reach out to the authors for additional information.

## Conclusion

This review synthesizes the literature on virtual and remote Opioid Poisoning Education and Naloxone Distribution (OPEND) programs, and underscores gaps in program implementation and evaluation. Currently, it is difficult to draw substantial conclusions on OPEND effectiveness

377 due to the variety of study designs and the lack of updated and validated evaluation methods.  
378 However, existing evidence points to the potential to increase knowledge, decrease stigma, and  
379 ultimately reduce morbidity and mortality due to opioid-related harms. This life-saving  
380 knowledge can significantly and positively impact populations who are not currently being  
381 adequately reached by in-person OPEND interventions.

## 382 **Authors' Contributions**

383 Conceptualization: AMS, AK, AO, NR, DM, JM, KP, MR, SB, JC, KM, JS

384 Methodology: AMS, AK, AO, BDS, RFN

385 Formal analysis: BDS, RFN

386 Investigation: BDS, RFN

387 Data curation: BDS, RFN

388 Writing – original draft: BDS, RFN

389 Writing – review and editing: AMS, AK, AO

390 Visualization: BDS, RFN

391 Supervision: AMS, AK, AO

392 Project administration: AMS, AK

393 Funding acquisition: AO, DM, JM, KP, MR, SB, JC, KM, JS

## 394 **Acknowledgements**

395 We acknowledge the time and efforts of Eden Kinzel, Liaison and Education Librarian at the  
396 University of Toronto, who provided expertise in the development of the research question and  
397 search strategy.

## 398 **Conflicts of interest**

399 The authors declare no conflict of interest.

## References

1. United Nations : Office on Drugs and Crime [Internet]. [cited 2023 Oct 23]. Online World Drug Report 2023 - Latest data and trend analysis. Available from: [//www.unodc.org/unodc/en/data-and-analysis/wdr-2023-online-segment.html](https://www.unodc.org/unodc/en/data-and-analysis/wdr-2023-online-segment.html)
2. Krausz RM, Westenberg JN, Ziafat K. The opioid overdose crisis as a global health challenge. *Curr Opin Psychiatry*. 2021 Jul;34(4):405.
3. Institute for Health Metrics and Evaluation. Global Burden of Disease Study 2019 (GBD 2019) [Internet]. [cited 2023 Aug 9]. Available from: <https://ghdx.healthdata.org/gbd-2019>
4. Special Advisory Committee on the Epidemic of Opioid Overdoses. Opioid- and Stimulant-related Harms in Canada [Internet]. Ottawa: Public Health Agency of Canada; 2022 Jun [cited 2022 Sep 15]. Available from: <https://health-infobase.canada.ca/substance-related-harms/opioids-stimulants/>
5. Centers for Disease Control and Prevention. Annual Surveillance Report Of Drug-related Risks And Outcomes. Centers for Disease Control and Prevention, U.S. Department of Health and Human Services; 2019.
6. Public Health Agency of Canada. Highlights from phase one of the national study on opioid and illegal substance-related overdose deaths: insights from coroners and medical examiners [Internet]. 2018 [cited 2022 Sep 29]. Available from: <https://www.canada.ca/en/public-health/services/publications/healthy-living/highlights-phase-one-national-study-opioid-illegal-substance-related-overdose-deaths.html>
7. Shannon O, Vera G, Krista L. At-a-glance - Hospitalizations and emergency department visits due to opioid poisoning in Canada. *Health Promot Chronic Dis Prev Can Res Policy Pract*. 2018 Jun;38(6):244–7.
8. Riazi F, Toribio W, Irani E, Hughes TM, Huxley-Reicher Z, McBratney E, et al. Community Case Study of Naloxone Distribution by Hospital-Based Harm Reduction Program for People Who Use Drugs in New York City. *Front Sociol* [Internet]. 2021 [cited 2022 Oct 2];6. Available from: <https://www.frontiersin.org/articles/10.3389/fsoc.2021.619683>
9. Walley AY, Xuan Z, Hackman HH, Quinn E, Doe-Simkins M, Sorensen-Alawad A, et al. Opioid overdose rates and implementation of overdose education and nasal naloxone distribution in Massachusetts: interrupted time series analysis. *BMJ*. 2013 Jan 31;346:f174.
10. Razaghizad A, Windle SB, Filion KB, Gore G, Kudrina I, Paraskevopoulos E, et al. The Effect of Overdose Education and Naloxone Distribution: An Umbrella Review of Systematic Reviews. *Am J Public Health*. 2021 Aug;111(8):e1–12.
11. Pellegrino JL, Krob JL, Orkin A, Pellegrino JL, Krob JL, Orkin A. First Aid Education for Opioid Overdose Poisoning: Scoping Review. *Cureus* [Internet]. 2021 Jan 3 [cited 2023 Apr 26];13(1). Available from: <https://www.cureus.com/articles/46368-first-aid-education-for-opioid-overdose-poisoning-scoping-review>

12. Winograd RP, Werner KB, Green L, Phillips S, Armbruster J, Paul R. Concerns that an opioid antidote could “make things worse”: Profiles of risk compensation beliefs using the Naloxone-Related Risk Compensation Beliefs (NaRRC-B) scale. *Subst Abuse*. 2020 Apr 2;41(2):245–51.
13. Irvine MA, Buxton JA, Otterstatter M, Balshaw R, Gustafson R, Tyndall M, et al. Distribution of take-home opioid antagonist kits during a synthetic opioid epidemic in British Columbia, Canada: a modelling study. *Lancet Public Health*. 2018 May 1;3(5):e218–25.
14. Bardwell G, Lappalainen L. The need to prioritize research, policy, and practice to address the overdose epidemic in smaller settings in Canada. *Can J Public Health Rev Can Santé Publique*. 2021 Mar 29;112(4):733–6.
15. Pijl EM, Alraja A, Duff E, Cooke C, Dash S, Nayak N, et al. Barriers and facilitators to opioid agonist therapy in rural and remote communities in Canada: an integrative review. *Subst Abuse Treat Prev Policy*. 2022 Aug 26;17:62.
16. Canadian Centre on Substance Use and Addiction. Impacts of the COVID-19 Pandemic on People Who Use Substances. Ottawa, ON, CA: Canadian Centre on Substance Use and Addiction; 2020.
17. 11.2.4 Inclusion criteria - JBI Manual for Evidence Synthesis - JBI Global Wiki [Internet]. [cited 2023 Oct 17]. Available from: <https://jbi-global-wiki.refined.site/space/MANUAL/4687714/11.2.4+Inclusion+criteria>
18. Tricco AC, Lillie E, Zarin W, O’Brien KK, Colquhoun H, Levac D, et al. PRISMA Extension for Scoping Reviews (PRISMA-ScR): Checklist and Explanation. *Ann Intern Med*. 2018 Oct 2;169(7):467–73.
19. Westphal KK, Regoeczi W, Masotya M, Vazquez-Westphal B, Lounsbury K, McDavid L, et al. From Arksey and O’Malley and Beyond: Customizations to enhance a team-based, mixed approach to scoping review methodology. *MethodsX*. 2021;8:101375.
20. JBI Manual for Evidence Synthesis. Scoping reviews [Internet]. [cited 2023 Jun 26]. Available from: <https://jbi-global-wiki.refined.site/space/MANUAL/4687342/Chapter+11%3A+Scoping+reviews>
21. Dos Santos B, Nipun R farzan, Subic AM, Kubica A, Rondinelli N, Marentette D, et al. Remote Opioid Poisoning Education and Naloxone Distribution Programs: A Scoping Review Protocol. 2023 Jun 14 [cited 2023 Jun 26]; Available from: <https://osf.io/ew9rq>
22. JBI Manual for Evidence Synthesis. Data extraction [Internet]. [cited 2023 Jun 28]. Available from: <https://jbi-global-wiki.refined.site/space/MANUAL/4687700>
23. Sisson ML, Azuero A, Chichester KR, Carpenter MJ, Businelle MS, Shelton RC, et al. Feasibility and acceptability of online opioid overdose education and naloxone distribution: Study protocol and preliminary results from a randomized pilot clinical trial. *Contemp Clin Trials Commun*. 2023 Jun 1;33:101131.
24. Sisson ML, Azuero A, Chichester KR, Carpenter MJ, Businelle MS, Shelton RC, et al. Preliminary effectiveness of online opioid overdose and naloxone administration training



and impact of naloxone possession on opioid use. *Drug Alcohol Depend.* 2023 Aug 1;249:110815.

25. Adams N. Beyond narcan: comprehensive opioid training for law enforcement. *J Subst Use.* 2021 Aug;26(4):383–90.
26. Beiting KJ, Molony J, Ari M, Thompson K. Targeted virtual opioid overdose education and naloxone distribution in overdose hotspots for older adults during COVID-19. *J Am Geriatr Soc.* 2022 Sep 28;jgs.18037.
27. Bergeria CL, Huhn AS, Dunn KE. Randomized comparison of two web-based interventions on immediate and 30-day opioid overdose knowledge in three unique risk groups. *Prev Med.* 2019;128(pm4, 0322116):105718.
28. Berland N, Lugassy D, Fox A, Goldfeld KK, Oh SY, Tofighi B, et al. Use of Online Opioid Overdose Prevention Training for First Year Medical Students: A Comparative Analysis of Online vs In-Person training. *Subst Abuse.* 2019;40(2):240–6.
29. Brown M, Tran C, Dadiomov D. Lowering barriers to naloxone access through a student-led harm reduction program. *J Am Pharm Assoc JAPhA.* 2023;63(1):349–55.
30. Castillo E. Engaging healthcare providers to coprescribe naloxone to prevent opioid-induced mortality in Arizona. *Diss Abstr Int Sect B Sci Eng.* 2022;83(7-B):No-Specified.
31. Cerles AA, Dinh NNL, MacMillan L, Kemp DC, Rush MA. Development of Novel Video-Based First Responder Opioid Hazard Refresher Training. *New Solut J Environ Occup Health Policy NS.* 2021;31(3):298–306.
32. Eukel H, Steig J, Frenzel O, Skoy E, Werremeyer A, Strand M. Opioid Misuse and Overdose: Changes in Pharmacist Practices and Outcomes. *J Contin Educ Health Prof.* 2020;40(4):242–7.
33. Farrugia A, Treloar C, Fraser S. Overdoselivesavers.org: A mixed-method evaluation of a public information website on experiences of overdose and using take-home naloxone to save lives. *Drugs Educ Prev Policy.* 2022;29(1):43–53.
34. French R, Favaro J, Aronowitz SV. A free mailed naloxone program in Philadelphia amidst the COVID-19 pandemic. *Int J Drug Policy.* 2021 Aug;94:103199.
35. Galiher MV, Huffman M. Attitude changes following short-form opioid overdose video education: a pilot study. *Harm Reduct J.* 2022 Oct 14;19(1):114.
36. Giordano NA, Whitney CE, Axson SA, Cassidy K, Rosado E, Hoyt-Brennan AM. A pilot study to compare virtual reality to hybrid simulation for opioid-related overdose and naloxone training. *Nurse Educ Today.* 2020 Feb 10;88:104365.
37. Giordano NA, Febres-Cordero S, Baker H, Pfeiffer KM, Walsh LM, Gish A, et al. Opioid-involved overdose trainings delivered using remote learning modalities. *Nurs Open.* 2023;10(6):4132–6.

38. Goss NC, Haslund-Gourley B, Meredith DM, Friedman AV, Kumar VK, Samson KR, et al. A Comparative Analysis of Online Versus in-Person Opioid Overdose Awareness and Reversal Training for First-Year Medical Students. *Subst Use Misuse*. 2021;56(13):1962–71.
39. Hohmann L, Phillippe H, Marlowe K, Jeminiwa R, Hohmann N, Westrick S, et al. A state-wide education program on opioid use disorder: influential community members' knowledge, beliefs, and opportunities for coalition development. *BMC Public Health*. 2022;22(1):886.
40. Hughes TM, Kalicki A, Huxley-Reicher Z, Toribio W, Samuels DL, Weiss JJ, et al. A medical student-led model for telephone-based opioid overdose education and naloxone distribution during the COVID-19 pandemic. *Subst Abuse*. 2022;43(1):988–92.
41. Huhn AS, Garcia-Romeu AP, Dunn KE. Opioid Overdose Education for Individuals Prescribed Opioids for Pain Management: Randomized Comparison of Two Computer-Based Interventions. *Front Psychiatry* [Internet]. 2018 [cited 2022 Nov 17];9. Available from: <https://www.frontiersin.org/articles/10.3389/fpsyt.2018.00034>
42. Jensen AN, Beam CM, Douglass AR, Brabson JE, Colvard M, Bean J. Description of a pharmacist-led clinical video telehealth group clinic for opioid overdose prevention and naloxone education. *Ment Health Clin*. 2019;9(4):294–7.
43. Kim H, Heverling H, Cordeiro M, Vasquez V, Stolbach A. Internet Training Resulted in Improved Trainee Performance in a Simulated Opioid-Poisoned Patient as Measured by Checklist. *J Med Toxicol Off J Am Coll Med Toxicol*. 2016 Sep;12(3):289–94.
44. Mathias CW, Cavazos DM, McGlothen-Bell K, Crawford AD, Flowers-Joseph B, Wang Z, et al. Opioid overdose prevention education in Texas during the COVID-19 pandemic. *Harm Reduct J*. 2023 Mar 24;20(1):37.
45. Millikan MD. A quality improvement project: Implementing the this is not about drugs program in southwest Kansas. *Diss Abstr Int Sect B Sci Eng*. 2021;82(8-B):No-Specified.
46. Moses TEH, Moreno JL, Greenwald MK, Waineo E. Training medical students in opioid overdose prevention and response: Comparison of In-Person versus online formats. *Med Educ Online*. 2021 Jan 1;26(1):1994906.
47. Roe SS, Banta-Green CJ. An Initial Evaluation of Web-Based Opioid Overdose Education. *Subst Use Misuse*. 2016 Jan 28;51(2):268–75.
48. Rothbauer K, Genisot A, Frey T, Johnson Pharmacy William S Middleton Memorial Veterans Hospital D. Integration of Pharmacy Student Interns into a Naloxone Telephone Outreach Service. *J Pain Palliat Care Pharmacother*. 2022 Dec;36(4):208–15.
49. Simmons J, Rajan S, Goldsamt L, Elliott L. Implementation of online opioid overdose prevention, recognition and response trainings for professional first responders: Year 1 survey results. *Drug Alcohol Depend*. 2016 Dec 1;169:1–4.
50. Simmons J, Rajan S, Goldsamt LA, Elliott L. Implementation of Online Opioid Prevention, Recognition and Response Trainings for Laypeople: Year 1 Survey Results. *Subst Use Misuse*. 2018 Oct 15;53(12):1997–2002.

51. Waldron AC. Opioid and naloxone training in a rural school district. *Diss Abstr Int Sect B Sci Eng.* 2022;83(4-B):No-Specified.
52. Wu S, Frey T, Wenthur CJ. Naloxone acceptance by outpatient veterans: A risk-prioritized telephone outreach event. *Res Soc Adm Pharm RSAP.* 2021;17(5):1017–20.
53. Yang C, Favaro J, Meacham MC. NEXT Harm Reduction: An Online, Mail-Based Naloxone Distribution and Harm-Reduction Program. *Am J Public Health.* 2021 Apr;111(4):667–71.
54. Yates D, Frey T, Montgomery JC. Utilizing risk index for overdose or serious opioid-induced respiratory depression (RIOSORD) scores to prioritize offer of rescue naloxone in an outpatient veteran population: A telephone-based project. *Subst Abuse.* 2018;39(2):182–4.
55. Sisson ML. Increasing naloxone access for persons who use opioids: An online recruitment and training approach to opioid overdose education and naloxone distribution. *Diss Abstr Int Sect B Sci Eng.* 2023;84(4-B):No-Specified.
56. Abdelal R, Raja Banerjee A, Carlberg-Racich S, Darwaza N, Ito D, Shoaff J, et al. Real-world study of multiple naloxone administration for opioid overdose reversal among bystanders. *Harm Reduct J.* 2022;19(1):49.
57. Keane C, Egan JE, Hawk M. Effects of naloxone distribution to likely bystanders: Results of an agent-based model. *Int J Drug Policy.* 2018;55(9014759):61–9.
58. Shoup JA, Mueller SR, Binswanger IA, Williams AV, Strang J, Glanz JM. Modifying and Evaluating the Opioid Overdose Knowledge Scale for Prescription Opioids: A Pilot Study of the Rx-OOKS. *Pain Med Off J Am Acad Pain Med.* 2020 Aug 22;21(10):2244–52.
59. Franklin Edwards G, Mierisch C, Mutcheson B, Horn K, Henrickson Parker S. A review of performance assessment tools for rescuer response in opioid overdose simulations and training programs. *Prev Med Rep.* 2020 Oct 21;20:101232.
60. Friesen EL, Kurdyak PA, Gomes T, Kolla G, Leece P, Zhu L, et al. The Impact of the COVID-19 Pandemic on Opioid-Related Harm in Ontario [Internet]. Ontario COVID-19 Science Advisory Table; 2021 Sep [cited 2022 Sep 15]. Available from: <https://covid19-sciencetable.ca/sciencebrief/the-impact-of-the-covid-19-pandemic-on-opioid-related-harm-in-ontario>
61. Agency for Healthcare Research and Quality. Race, Ethnicity, and Language Data: Standardization for Health Care Quality Improvement [Internet]. 2018 [cited 2023 Aug 10]. Available from: <https://www.ahrq.gov/research/findings/final-reports/iomracereport/reldata1.html>
62. Jakubowski A, Kunins HV, Huxley-Reicher Z, Siegler A. Knowledge of the 911 Good Samaritan Law and 911-calling behavior of overdose witnesses. *LawAtlas B Grant*KJ, Banta Green, CJ, KuszlerPC, CoffinPO, SchoeppeJA, CerdaM, RansomeY, KeyesKM, et al, DarkeS, RossJ, ZadorD, SunjicS, DavidsonPJ, McLeanRL, KralAH, GleghornAA, EdlinBR, MossAR, HernanMA, Hernan, A, JonesJD, CampbellIA, MetzVE, ComerSD, LankenauSE, WagnerKD, SilvaK, et al, LevyB, SpelkeB, PaulozziLJ, et al, PolliniRA, McCallL, MehtaSH, CelentanoDD, VlahovD, StrathdeeSA, Rudd, RA, AleshireN, ZibbellJE, GladdenRM, ShermanSG, GannDS, ScottG, CarlbergS, BiggD, HeimerR, SieglerA, Huxley Reicher

MaldjianL, JordanR, OliverC, JakubowskiA, KuninsHV, SieglerA, TuazonE, Bradley O'BrienD, PaoneD, TobinKE, DaveyMA, LatkinCA, TracyM, PiperTM, OmpadD, et al, editor. Subst Abuse. 2018;39(2):233–8.

63. Sellen K, Markowitz B, Parsons JA, Leece P, Handford C, Goso N, et al. Considerations for the design of overdose education and naloxone distribution interventions: results of a multi-stakeholder workshop. BMC Public Health. 2023 May 15;23(1):888.
64. Tas B, Lawn W, Traykova EV, Evans RAS, Murvai B, Walker H, et al. A scoping review of mHealth technologies for opioid overdose prevention, detection, and response. [Internet]. PsyArXiv; 2022 [cited 2023 May 24]. Available from: <https://psyarxiv.com/trfbc/>

## **Supporting information**

**S1 Appendix. Search strategy.**

**S2 Appendix: Data extraction instrument.**
